# Supplementary material
Source: PubMed Central journal article supplement (PMC6726903)
Supplement: EMBR-20-e47498-s001.pdf [file EMBR-20-e47498-s001.pdf]

**Appendix: DDX3X and Specific Initiation Factors Modulate *FMR1* Repeat-Associated Non-AUG initiated translation**

| <b><u>Appendix Table of contents:</u></b> | <b><u>Page #:</u></b> |
|-------------------------------------------|-----------------------|
| 1. Table of contents page                 | 1                     |
| 2. Appendix Figure S1                     | 2                     |
| 3. Appendix Figure S2                     | 3                     |
| 4. Appendix Figure S3                     | 4                     |
| 5. Appendix Figure S4                     | 5                     |
| 6. Appendix Figure S5                     | 6                     |
| 7. Appendix Figure S6                     | 8                     |
| 8. Appendix Figure S7                     | 9                     |
| 9. Appendix Figure S7 Figure legend       | 10                    |
| 10. Appendix Figure S8                    | 11                    |
| 11. Appendix Figure S9                    | 12                    |
| 12. Appendix Figure S10                   | 13                    |
| 13. Appendix Figure S11                   | 15                    |
| 14. Appendix Figure S12                   | 16                    |
| 15. Appendix Table S1                     | 17                    |
| 16. Appendix Table S1                     | 18                    |

|                             |                          | GMR-GAL4,<br>(CGG) <sub>90</sub> -EGFP | GMR-GAL4 |        |  | GMR-GAL4,<br>(CGG) <sub>90</sub> -EGFP | GMR-GAL4 |
|-----------------------------|--------------------------|----------------------------------------|----------|--------|--|----------------------------------------|----------|
| <b>shCherry</b>             |                          |                                        |          |        |  |                                        |          |
| <b>Belle</b>                | shBelle 1                | Blue                                   |          |        |  |                                        |          |
|                             | shBelle 2                | Blue                                   |          |        |  |                                        |          |
|                             | shBelle 3                | Blue                                   |          |        |  |                                        |          |
|                             | shBelle 4                | Blue                                   |          |        |  |                                        |          |
|                             | Belle <sup>6</sup>       | Blue                                   |          |        |  |                                        |          |
|                             | Belle <sup>EKE</sup>     | Blue                                   |          |        |  |                                        |          |
|                             | Belle <sup>L4740</sup>   | Blue                                   |          |        |  |                                        |          |
|                             | Belle <sup>74407</sup>   | Blue                                   |          |        |  |                                        |          |
|                             | Belle <sup>cap-1</sup>   | Blue                                   |          |        |  |                                        |          |
|                             | Belle <sup>47110</sup>   |                                        |          |        |  |                                        |          |
| <b>eIF4B</b>                | shEIF4B                  | Blue                                   |          |        |  |                                        |          |
|                             | UAS-EIF4B                | Salmon                                 |          |        |  |                                        |          |
| <b>eIF4H1, 2</b>            | shEIF4H1 1               | Blue                                   |          |        |  |                                        |          |
|                             | shEIF4H1 2               | Blue                                   |          |        |  |                                        |          |
|                             | shEIF4H1 3               | Blue                                   |          |        |  |                                        |          |
|                             | shEIF4H2 1               | Blue                                   |          |        |  |                                        |          |
|                             | shEIF4H2 2               |                                        |          |        |  |                                        |          |
| <b>eIF1</b>                 | shEIF1 1                 | Blue                                   |          |        |  |                                        |          |
|                             | shEIF1 2                 | Blue                                   |          |        |  |                                        |          |
|                             | EIF1 <sup>EY02210</sup>  | Blue                                   |          |        |  |                                        |          |
|                             | shEIF1 3                 | Salmon                                 |          |        |  |                                        |          |
|                             | shEIF1 4                 | Salmon                                 |          |        |  |                                        |          |
|                             | shEIF1 5                 | Salmon                                 |          |        |  |                                        |          |
| <b>eIF1A</b>                | shEIF1A 1                | Salmon                                 |          |        |  |                                        |          |
|                             | shEIF1A 2                | Salmon                                 |          |        |  |                                        |          |
|                             | shEIF1A 3                | Salmon                                 |          |        |  |                                        |          |
|                             | shEIF1A 4                | Salmon                                 |          |        |  |                                        |          |
|                             | EIF1A <sup>645</sup>     | Salmon                                 |          |        |  |                                        |          |
|                             | EIF1A <sup>2232</sup>    |                                        |          |        |  |                                        |          |
|                             | EIF1A <sup>c04533</sup>  |                                        |          |        |  |                                        |          |
|                             | EIF1A <sup>EP935</sup>   |                                        | Salmon   |        |  |                                        |          |
|                             | UAS-EIF1A                |                                        |          |        |  |                                        |          |
| <b>eIF2α</b>                | shEIF2α 1                | Salmon                                 |          |        |  |                                        |          |
|                             | shEIF2α 2                | Salmon                                 |          |        |  |                                        |          |
|                             | shEIF2α 3                | Salmon                                 |          | Salmon |  |                                        |          |
|                             | EIF2α <sup>815-29</sup>  | Salmon                                 |          |        |  |                                        |          |
|                             | UAS-EIF2α                |                                        |          |        |  |                                        |          |
| <b>eIF3B</b>                | EIF3B <sup>EY14430</sup> | Salmon                                 |          | Salmon |  |                                        |          |
| <b>eIF4A</b>                | shEIF4A                  |                                        |          |        |  |                                        |          |
|                             | UAS-EIF4A                |                                        |          |        |  |                                        |          |
|                             | EIF4A <sup>1013</sup>    |                                        |          |        |  |                                        |          |
| <b>eIF5, eIF5B</b>          | shEIF5 1                 |                                        |          |        |  |                                        |          |
|                             | shEIF5 2                 |                                        |          |        |  |                                        |          |
|                             | UAS-EIF5                 |                                        |          |        |  |                                        |          |
|                             | EIF5B <sup>O9143</sup>   |                                        |          |        |  |                                        |          |
| <b>RNA Helicases</b>        | EIF5B <sup>EY01401</sup> |                                        |          |        |  |                                        |          |
|                             | shRHAU                   |                                        |          |        |  |                                        |          |
|                             | UAS-RHAU                 | Salmon                                 |          | Salmon |  |                                        |          |
|                             | shDHX57                  |                                        |          |        |  |                                        |          |
|                             | shBGCN 1                 | Blue                                   |          |        |  |                                        |          |
| <b>Ribosomal Proteins</b>   | shBGCN 2                 | Blue                                   |          |        |  |                                        |          |
|                             | shBGCN 3                 |                                        |          |        |  |                                        |          |
|                             | BGCN <sup>KG08129</sup>  |                                        |          |        |  |                                        |          |
|                             | shRPS25 1                | Salmon                                 |          |        |  |                                        |          |
| <b>RNA-Binding Proteins</b> | shRPS25 2                | Salmon                                 |          |        |  |                                        |          |
|                             | shSF2 1                  | Blue                                   |          |        |  |                                        |          |
|                             | shSF2 2                  | Blue                                   |          |        |  |                                        |          |

  

|            |        |
|------------|--------|
| Suppressor | Blue   |
| Enhancer   | Salmon |
| No Effect  |        |

**Appendix Figure S1. Summary of the Candidate-Based Screen For Modifiers of (CGG)<sub>90</sub>-Elicited Toxicity.**

Candidate modifier genes for RAN translation were crossed to either GMR-Gal4; (CGG)<sub>90</sub>-eGFP flies or GMR-Gal4 alone and their eye phenotypes were assessed. Blue indicates suppression of the rough eye phenotype. Salmon indicates exacerbation or induction of a rough eye phenotype. Each candidate modifier was screened against both GMR-Gal4; (CGG)<sub>90</sub>-eGFP flies or GMR-Gal4 alone across a minimum of two independent crosses with at least 25 flies evaluated per cross.

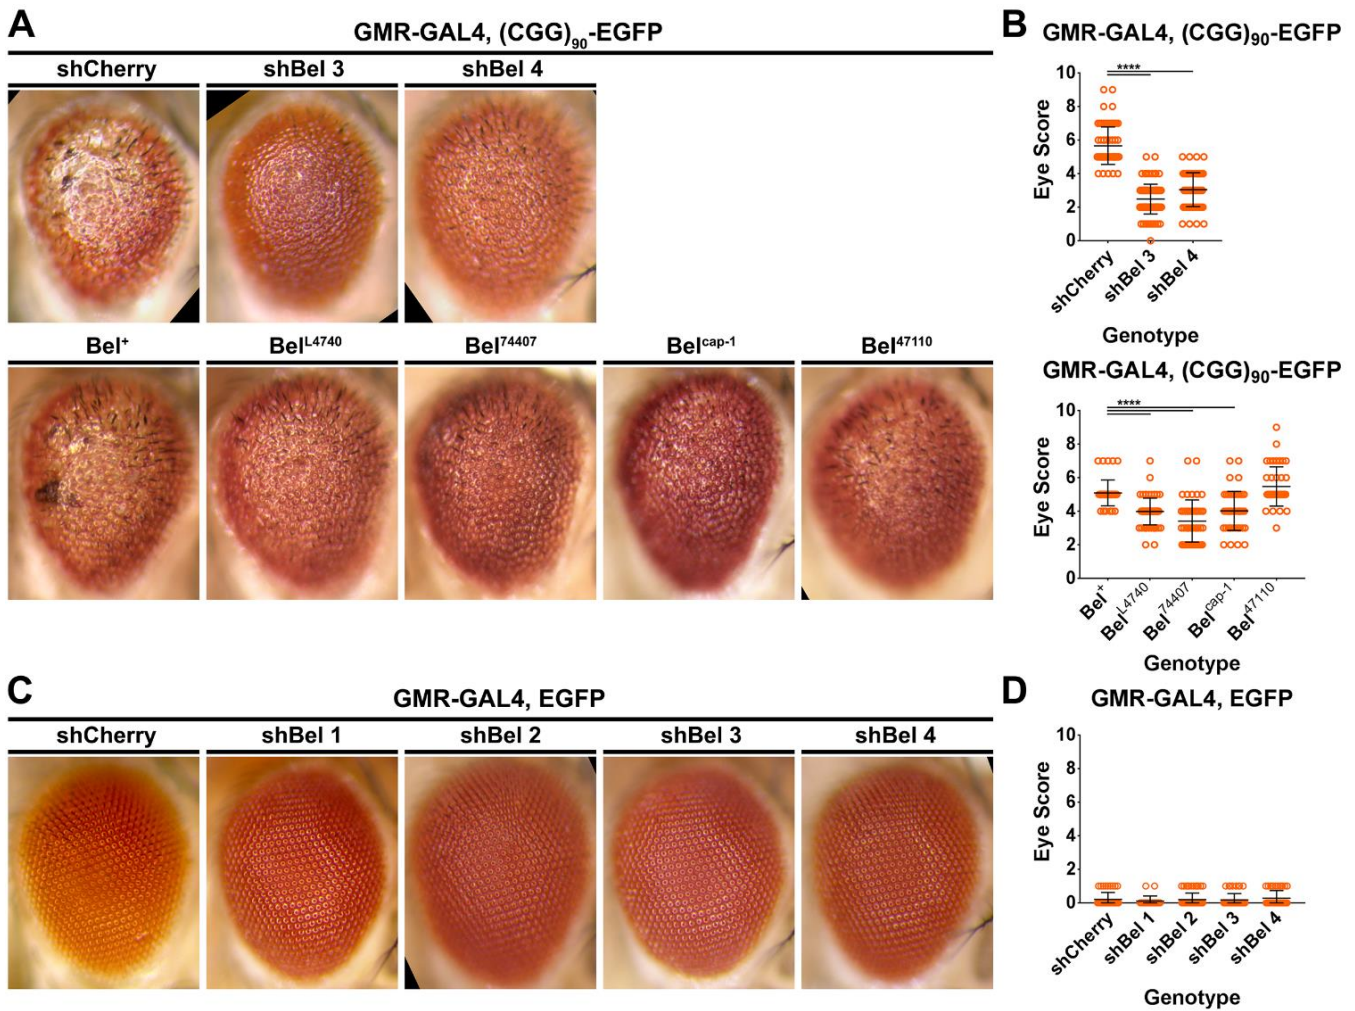

**Appendix Figure S2. Belle Disruption Mitigates (CGG)<sub>90</sub>-Elicited Toxicity.**

A Representative photographs of fly eyes expressing GMR-GAL4, (CGG)<sub>90</sub>-EGFP with additional *belle* disruptions.

B Quantitation of GMR-GAL4, (CGG)<sub>90</sub>-EGFP eye phenotypes with additional *belle* disruptions (Mann-Whitney U test with Bonferonni corrections for multiple comparisons;  $n=42-98$ /genotype)

C Representative photographs of fly eyes expressing GMR-GAL4 and an AUG-initiated EGFP, along with *belle* shRNAs.

D Quantitation of GMR-GAL4, EGFP eye phenotypes with *belle* shRNAs ( $n=20-64$ /genotype).

Data Information: For all panels, \*\*\*\*  $P \leq 0.0001$  for the specified statistical test (compiled from  $\geq 3$  replicates).

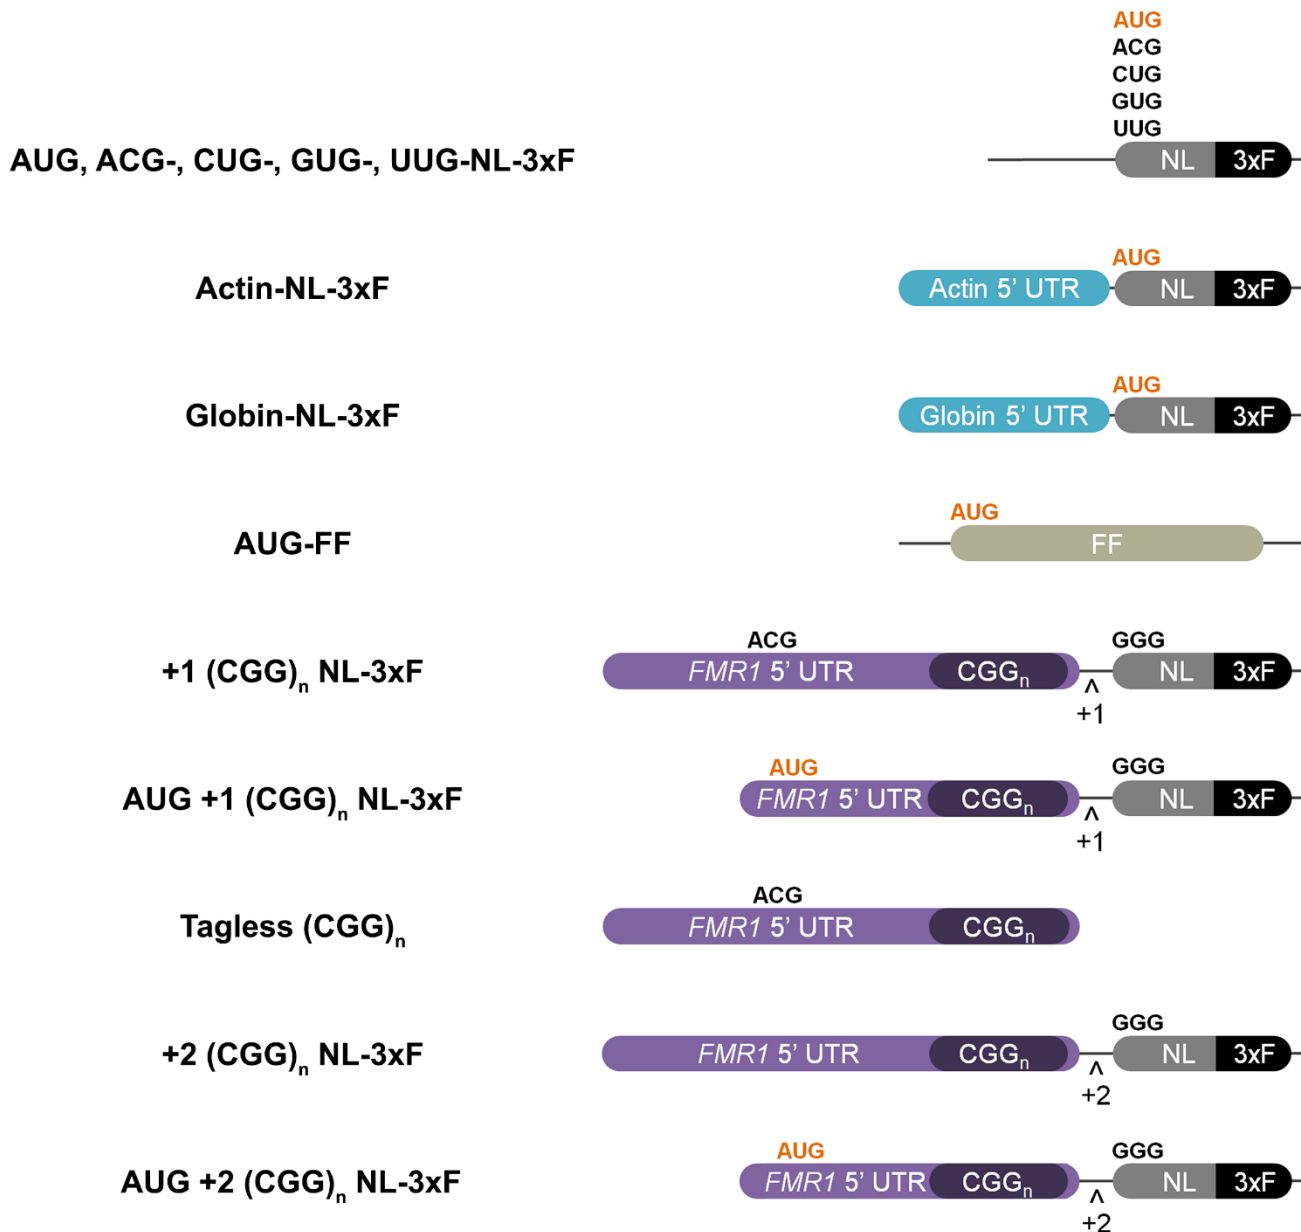

**Appendix Figure S3. NL-3xF and FF Reporter Constructs Used in This Study.**

The tag (e.g., NL-3xF, FF, tagless), 5' leader sequence (e.g.,  $\beta$  Actin or  $\beta$  Globin 5' UTR), start codon (e.g., AUG, ACG, GGG), and tag reading frame relative to the CGG repeat (e.g., +1, +2) are indicated.

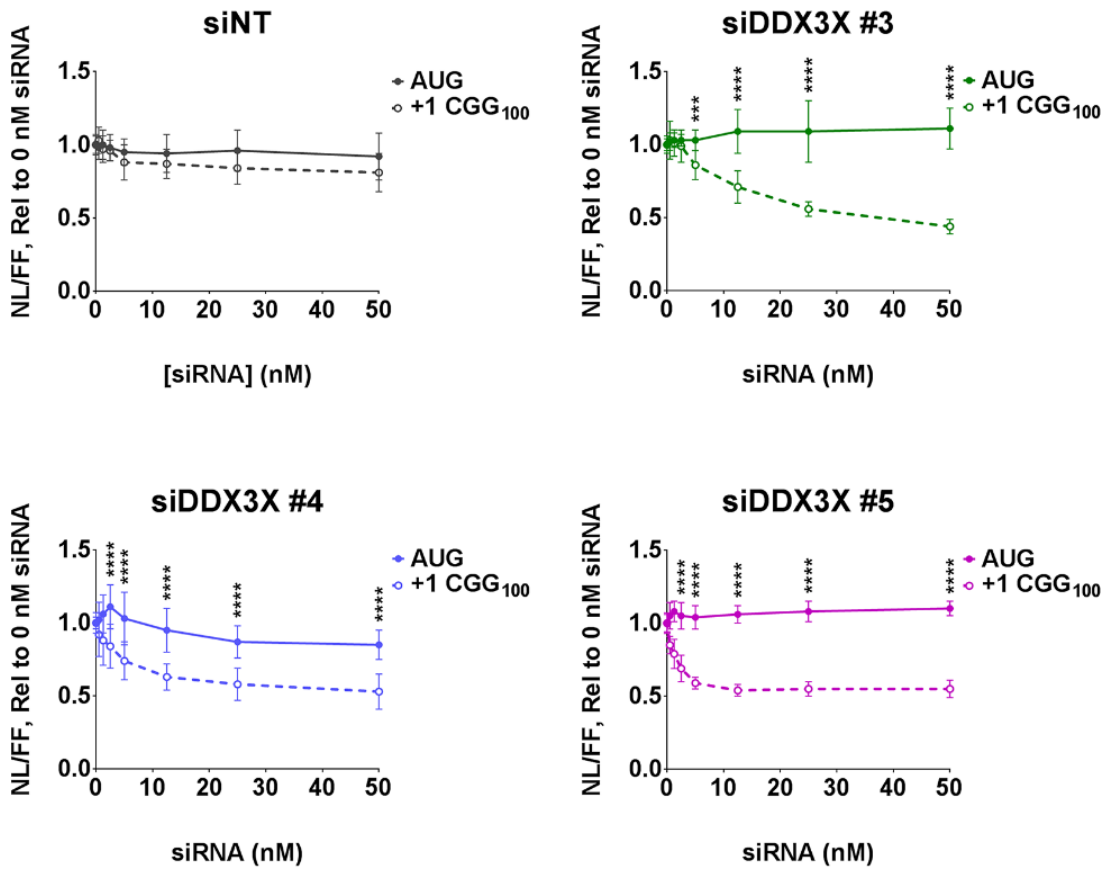

**Appendix Figure S4. Knockdown of *DDX3X* by 3 Additional siRNAs Selectively Inhibits RAN Translation of +1 (CGG)<sub>100</sub> NL-3xF.**

Asterisks indicate comparisons between relative AUG-NL-3xF and +1 (CGG)<sub>100</sub> NL-3xF expression (two-way ANOVA with Sidak's multiple comparisons test;  $n=9-21$ /condition). \*\*\*  $P \leq 0.001$ , \*\*\*\*  $P \leq 0.0001$  for the specified statistical test. Points represent means  $\pm$  SD (compiled from  $\geq 3$  replicates).

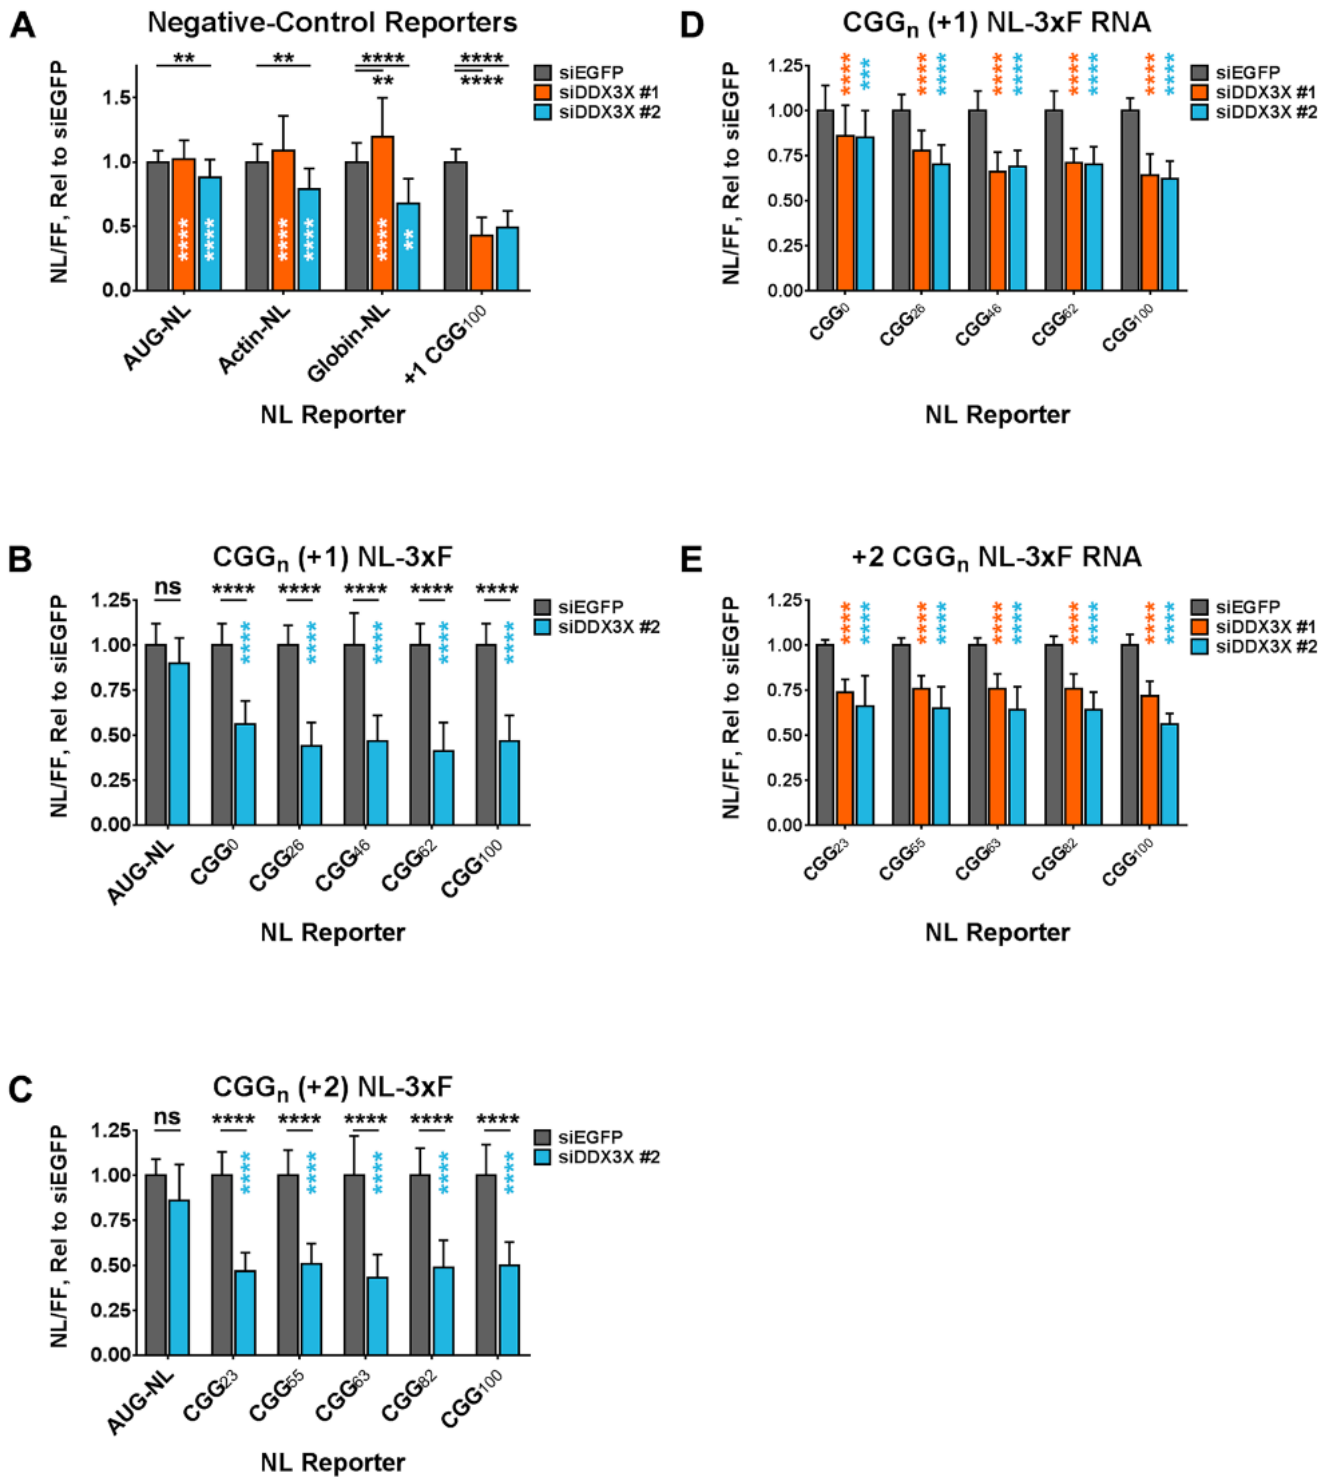

**Appendix Figure S5. *DDX3X* Knockdown Inhibits RAN Translation at CGG Repeats Selectively.**

A Expression in HeLa cells of transfected AUG-NL-3xF and +1 (CGG)<sub>100</sub> NL-3xF reporter plasmids, with and without *DDX3X* knockdown, compared to the expression of AUG-initiated NL-3xF reporters bearing the short, minimally-structured 5' UTRs of human *β actin* and *β globin* (two-way ANOVA with Tukey's multiple comparisons test; *n*=15-39/condition). Black asterisks refer to comparisons between

siEGFP-treated and siDDX3X-treated cells; white asterisks refer to comparisons between siDDX3X-treated cells expressing +1 (CGG)<sub>100</sub> NL-3xF and those expressing a different reporter.

B, C (CGG)<sub>n</sub>+1 and (CGG)<sub>n</sub>+2 NL-3xF expression with and without *DDX3X* knockdown across a range of CGG repeat sizes (two-way ANOVA with Tukey's multiple comparisons test; *n*=12-18/condition). Black asterisks refer to comparisons between siDDX3X- and siEGFP-treated cells; blue asterisks refer to comparisons between siDDX3X-treated cells expressing AUG-NL-3xF and those expressing a different reporter.

D, E Expression of *in vitro*-transcribed (CGG)<sub>n</sub>+1 and (CGG)<sub>n</sub>+2 NL-3xF reporter RNAs with and without *DDX3X* knockdown across a range of CGG repeat sizes (two-way ANOVA with Tukey's multiple comparisons test; *n*=12-24/condition). Orange and blue asterisks refer to comparisons between siDDX3X- and siEGFP-treated cells.

Data Information: For all panels, ns=non-significant, \*\* P≤0.01, \*\*\*\* P≤0.0001 for the specified statistical test. All panels depict data as means ± SD (compiled from ≥3 replicates).

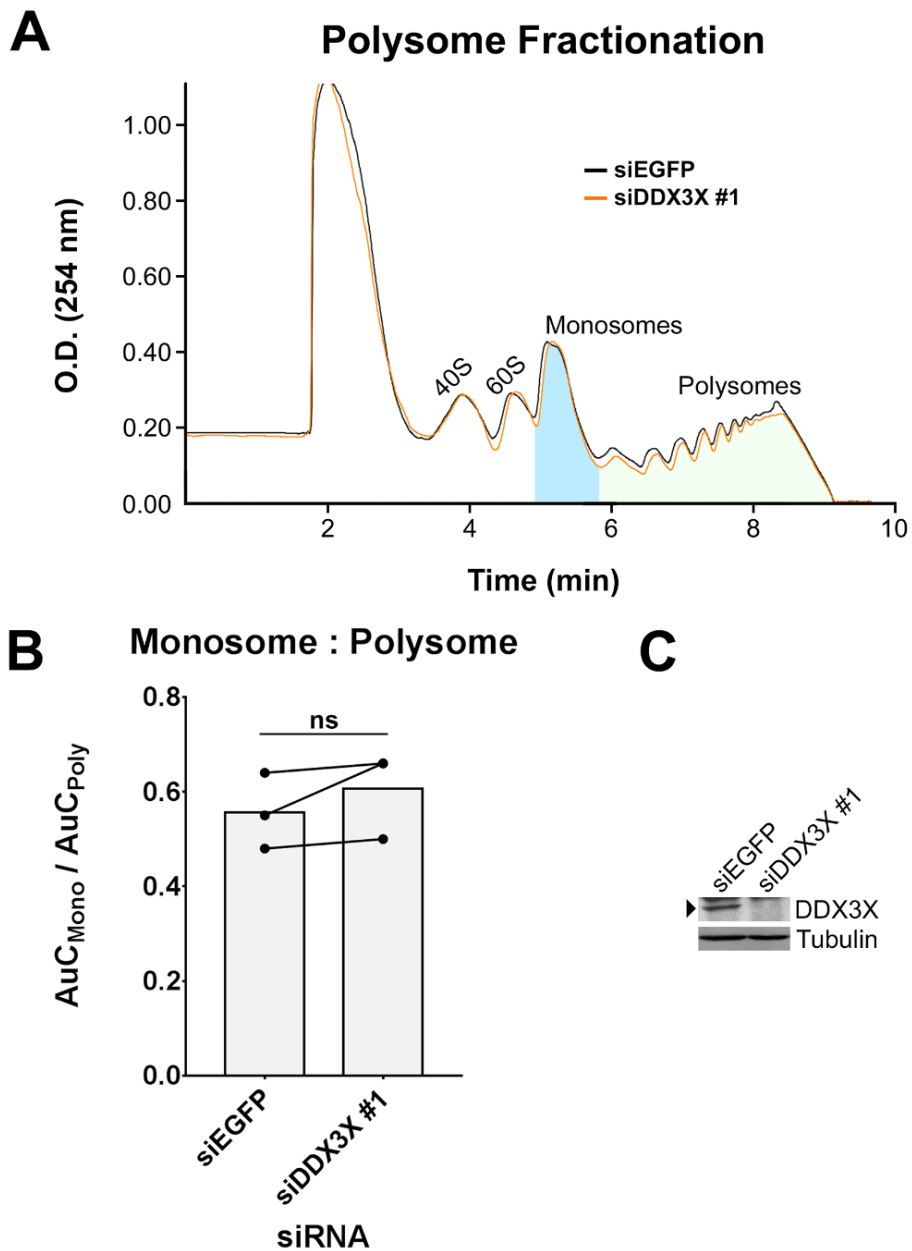

**Appendix Figure S6. Knockdown of *DDX3X* Does Not Inhibit Global Translation.**

A Representative polysome-fractionation profiles of HeLa-cell lysates transfected with siDDX3X #1 or siEGFP. The areas-under-the-curve (AuC) for monosomes and polysomes are shaded blue and green, respectively.

B Mean ratios ( $\pm$ SD) of the AuCs of monosomes to polysomes across three replicates (Student's paired t-test,  $n=3$ /condition). ns=non-significant.

C Anti-DDX3X western blot of HeLa lysates processed for polysome fractionation.



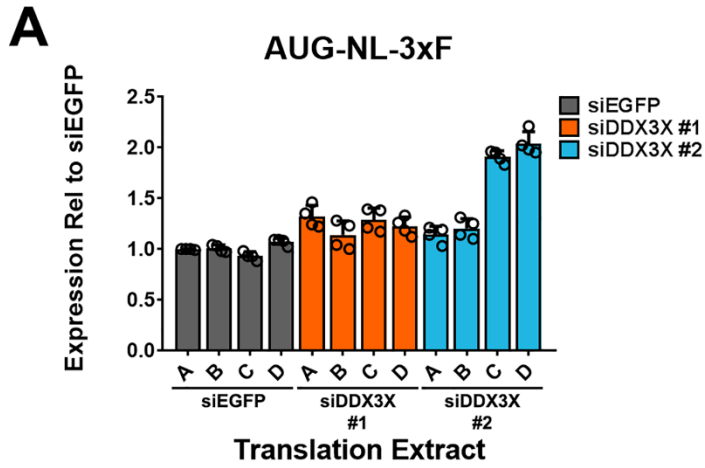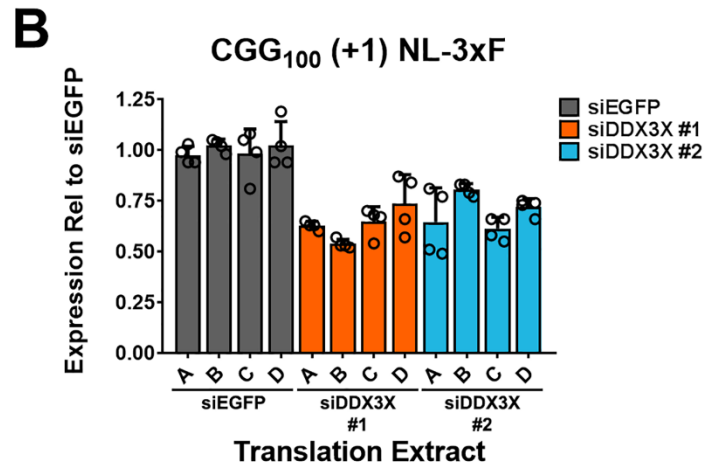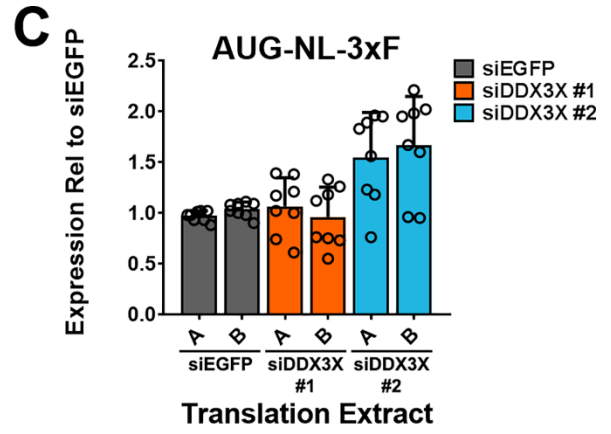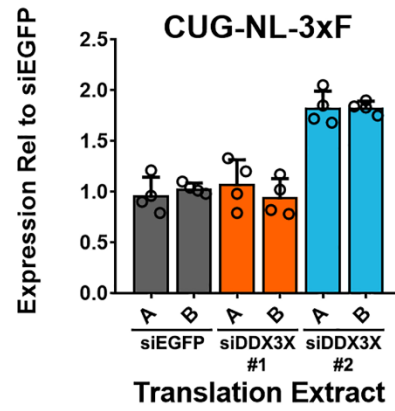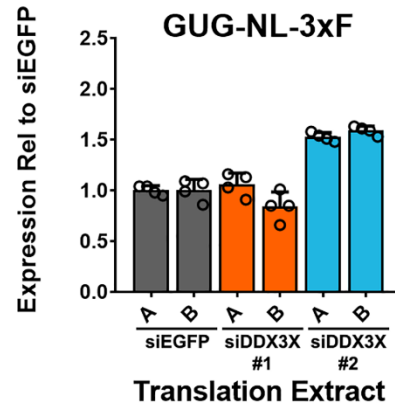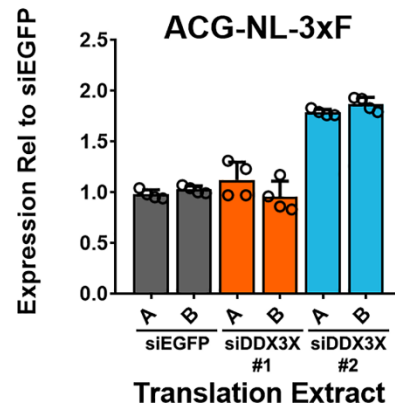

**Appendix Figure S7. Individual replicates from Independently-Prepared Translation Extracts.**

A, B Expression of *in vitro*-transcribed AUG-NL-3xF (A) and +1 (CGG)<sub>100</sub> NL-3xF RNAs (B) in *in vitro* translation extracts, collected from HeLa cells treated with siRNAs against EGFP or *DDX3X*. Four replicate lysates (“A-D”) were generated per siRNA. Panels depict pooled data (mean ± SD) gathered across two replicates.

C Expression of *in vitro* transcribed near-AUG reporter RNAs in *in vitro* translation extracts, collected from HeLa cells treated with siRNAs against EGFP or *DDX3X*. As above, panels depict pooled data gathered across two replicates. Reporter RNAs were tested in duplicate lysates (2 per siRNA).

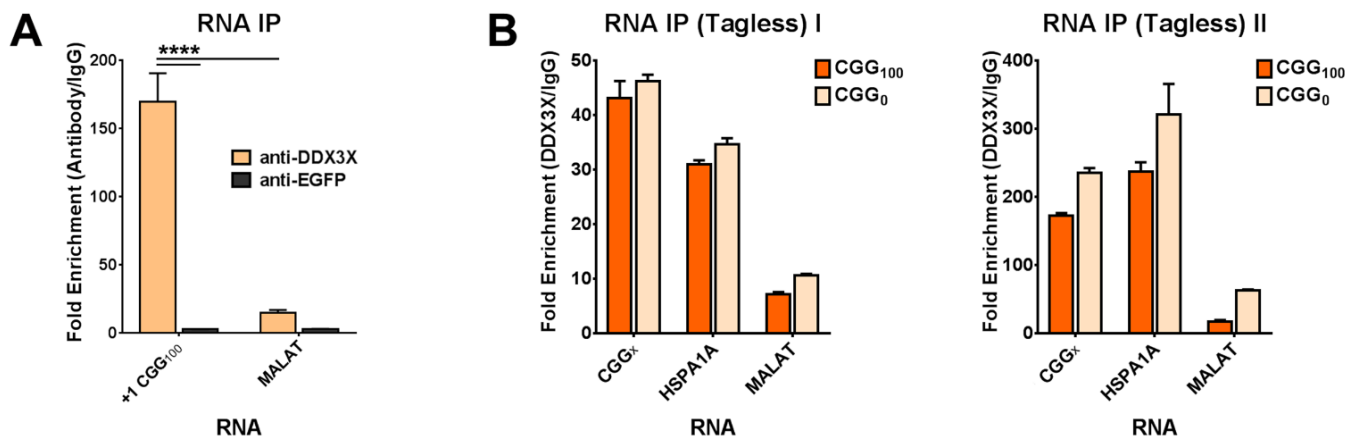

**Appendix Figure S8. Anti-DDX3X RNA Immunoprecipitation (RIP) Co-Precipitates +1 (CGG)<sub>100</sub> NL-3xF mRNA, Independent of the NL-3xF Tag or NRE Size.**

**A** Enrichment of +1 (CGG)<sub>100</sub> NL-3xF mRNA following anti-DDX3X RIP, relative to incubation with isotype control IgG. *MALAT* RNA, in contrast, is not enriched (Student's t test,  $n=3$ ). In addition, +1 (CGG)<sub>100</sub> NL-3xF mRNA is not enriched following anti-EGFP RIP from cells expressing EGFP (Student's t test,  $n=3$ ). This experiment is a replicate of that presented in Figure 4D.

**B** Enrichment of (CGG)<sub>100</sub>, (CGG)<sub>0</sub>, and *HSPA1A*, but not *MALAT* RNA, following anti-DDX3X IP in two independent replicates. In contrast with panel A and Figure 4D, the (CGG)<sub>100</sub> and (CGG)<sub>0</sub> constructs do not have a NL-3xF tag.

Data Information: \*\*\*\*  $P \leq 0.0001$ .

**+1 (CGG)<sub>n</sub> NL-3xF**

TAATACGACTCACTATAGGGAGACCCAAGCTGGCTAGCGTTTAACTTA  
AGCTTGGTACCGAGCTCGGATCCACTAGTCCAGTGTGGTGGAAATTCGTTA  
CAGATCTGCTCAGCTCCGTTTCGGTTTCACTTCCGGTGGAGGGCCG  
CCTCTGAGCGGGCGGCGGGCCGACGGCGAGCGCGGGCGGCGGCGGT  
G**ACGG**AGGCGCCGCTGCCAGGGGGCGTGCGGCAGCG(**CGG**)<sub>n</sub>CTGG  
GCCTCGAGGATATCAAGATCTGGCCTCGGCGGCCAAGCTTGGCAATCCGGT  
ACTGTTGGTAAAGCCACCGGGGTCTTCACACTC...

**AUG +1 (CGG)<sub>100</sub> NL-3xF**

TAATACGACTCACTATAGGGAGACCCAAGCTGGCTAGCGTTTAACTTA  
AGCTTGGTACCGAGCTCGGATCCACTAGTCCAGTGTGGTGGAAATTCGTTA  
CACC**ATG**GCGCCGCTGCCAGGGGGCGTGCGGCAGCG(**CGG**)<sub>100</sub>CTGGG  
CCTCGAGGATATCAAGATCTGGCCTCGGCGGCCAAGCTTGGCAATCCGG  
TACTGTTGGTAAAGCCACCGGGGTCTTCACACTC...

**+2 (CGG)<sub>n</sub> NL-3xF**

TAATACGACTCACTATAGGGAGACCCAAGCTGGCTAGCGTTTAACTTA  
AGCTTGGTACCGAGCTCGGATCCACTAGTCCAGTGTGGTGGAAATTCGTTA  
ACAGATCTGCTCAGCTCCGTTTCGGTTTCACTTCCGGTGGAGGGCCG  
CCTCTGAGCGGGCGGCGGGCCGACGGCGAGCGCGGGCGGCGGCGGT  
GACGGAGGCGCCGCTGCCAGGGGGCGTGCGGCAGCG(**CGG**)<sub>n</sub>CTGGG  
CCATCAAGATCTGGCCTCGGCGGCCAAGCTTGGCAATCCGGTACTGTTG  
GTAAAGCCACCGGGGTCTTCACACTC...

**AUG +2 (CGG)<sub>100</sub> NL-3xF**

TAATACGACTCACTATAGGGAGACCCAAGCTGGCTAGCGTTTAACTTA  
AGCTTGGTACCGAGCTCGGATCCACTAGTCCAGTGTGGTGGAAATTCGTT  
ACACC**ATG**GGGCGCCGCTGCCAGGGGGCGTGCGGCAGCG(**CGG**)<sub>100</sub>CTG  
GGCCTCGAGATTCGATCGTCGTGATATCAAGATCTGGCCTCGGCGG  
CCAAGCTTGGCAATCCGGTACTGTTGGTAAAGCCACCGGGGTCTTC  
CACTC...

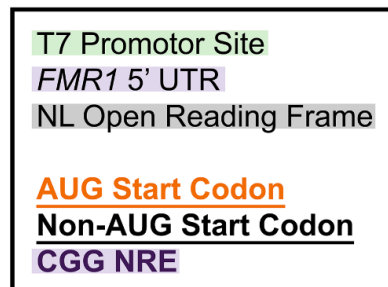

**Appendix Figure S9. Sequence Maps of the +1 and +2 (CGG)<sub>100</sub> NL-3xF Reporter Constructs, With and Without an AUG Inserted 5' to the CGG NRE.**

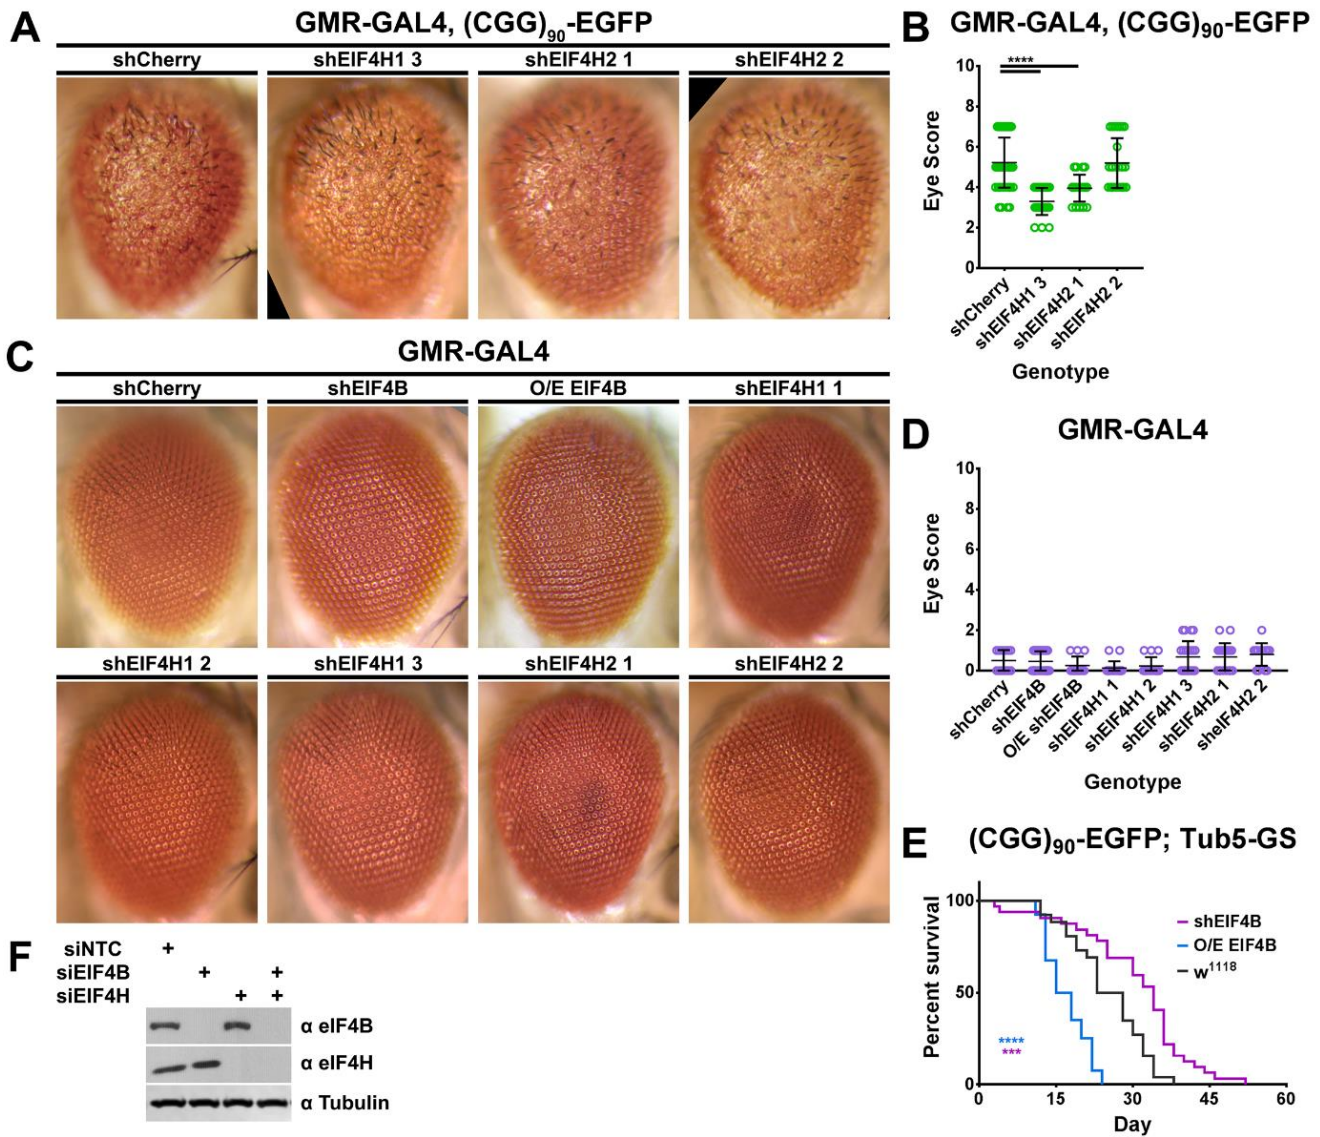

**Appendix Figure S10. Disruption of *eIF4B* or *eIF4H* Mitigate (CGG)<sub>90</sub>-Elicited Toxicity.**

- A** Representative photographs of fly eyes expressing GMR-GAL4, (CGG)<sub>90</sub>-EGFP with additional *eIF4H1* and *eIF4H2* shRNAs.
- B** Quantitation of GMR-GAL4, (CGG)<sub>90</sub>-EGFP eye phenotypes with additional *eIF4H1* and *eIF4H2* shRNAs (Mann-Whitney U test with Bonferonni corrections for multiple comparisons; *n*=21-55/genotype).
- C** Representative photographs of fly eyes expressing GMR-GAL4, without (CGG)<sub>90</sub>-EGFP, along with *eIF4H1* and *eIF4H2* shRNAs.
- D** Quantitation of GMR-GAL4 eye phenotypes with *eIF4B*, *eIF4H1*, and *eIF4H2* shRNAs (*n*=12-

33/genotype).

E Longevity assays of (CGG)<sub>90</sub>-EGFP; Tub5-GS flies with knockdown and over-expression of *eIF4B* (Log-rank Mantel-Cox test with Bonferroni corrections for multiple comparisons;  $n=26-32$ /genotype).

F Anti-eIF4B and anti-eIF4H western blot of HeLa cells transfected with siRNAs against *EIF4B* or *EIF4H*.

Data Information: For all panels, ns=non-significant, \*\*\*  $P \leq 0.001$ , \*\*\*\*  $P \leq 0.0001$  for the specified statistical test. All panels depict data as means  $\pm$  SD (compiled from  $\geq 3$  replicates).

## A eIF1 Knockdown

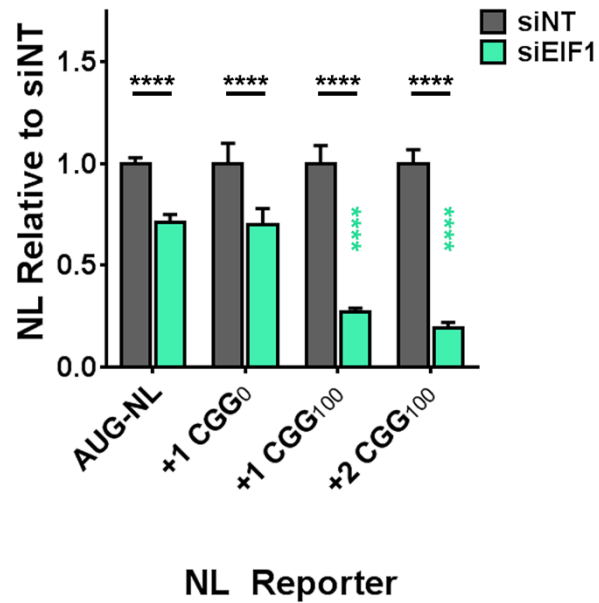

## B

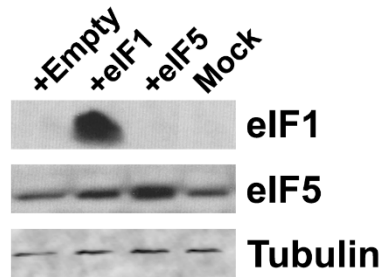

### Appendix Figure S11. *EIF1* Knockdown Inhibits Translation Reporters Globally.

A Expression of plasmid-based NL-3x<sub>F</sub> reporters in HEK293 cells with and without knockdown of *EIF1* (two-way ANOVA with Sidak's multiple comparisons test;  $n=12$ /condition). Black asterisks refer to comparisons between non-targeting siRNA (siNT)-transfected and siEIF1-transfected cells; green asterisks refer to comparisons between siEIF1-transfected cells expressing AUG-NL-3x<sub>F</sub> and those expressing a different reporter. Graph depicts data as mean  $\pm$  SD. \*\*\*\*  $P \leq 0.0001$ . Panel depicts data as means  $\pm$  SD (compiled from  $\geq 3$  replicates).

B Anti-eIF1 and -eIF5 western blot demonstrating over-expression of eIF1 and eIF5 after transfection of the respective plasmid constructs.

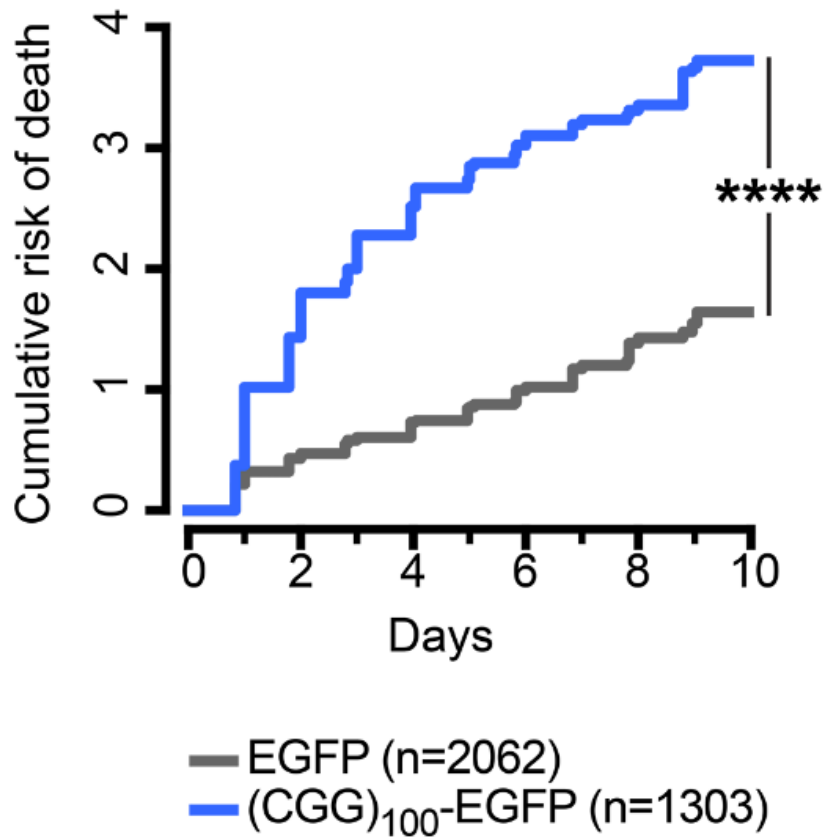

**Appendix Figure S12. +1 (CGG)<sub>100</sub> EGFP is More Toxic to Primary Rodent Neurons Than an AUG-Initiated EGFP Construct by Longitudinal Automated Fluorescence Microscopy.** Transfection of +1 (CGG)<sub>100</sub> EGFP plasmid-based reporters increased the cumulative risk of death in primary rodent neurons, relative to transfection of EGFP reporters. Cox proportional hazard analysis;  $n=1303-2062$  cells/condition. \*\*\*\*  $P<0.0001$ . Data compiled over 3 replicates.



| Fly Stock               | Source   | Catalog # |
|-------------------------|----------|-----------|
| shCherry                | BDSC     | 35785     |
| shBel 1                 | BDSC     | 35185     |
| shBel 2                 | BDSC     | 35302     |
| shBel 3                 | VDRRC    | 6299      |
| shBel 4                 | BDSC     | 28049     |
| w <sup>1118</sup>       | BDSC     | 5905      |
| Bel <sup>6</sup>        | BDSC     | 4024      |
| Bel <sup>EKE</sup>      | Deng Lab | -         |
| Bel <sup>L7470</sup>    | Deng Lab | -         |
| Bel <sup>74407</sup>    | Deng Lab | -         |
| Bel <sup>cap-1</sup>    | BDSC     | 1178      |
| Bel <sup>47110</sup>    | Deng Lab | -         |
| shEIF4B                 | BDSC     | 31364     |
| UAS-EIF4B               | Todd Lab | -         |
| shEIF4H1 1              | VDRRC    | 100817    |
| shEIF4H1 2              | VDRRC    | 34301     |
| shEIF4H1 3              | VDRRC    | 48119     |
| shEIF4H2 1              | VDRRC    | 102825    |
| shEIF4H2 2              | VDRRC    | 32192     |
| shEIF1 1                | VDRRC    | 29216     |
| shEIF1 2                | BDSC     | 55232     |
| EIF1 <sup>EY02210</sup> | BDSC     | 15406     |
| shEIF1 3                | BDSC     | 57174     |
| shEIF1 4                | VDRRC    | 29215     |
| shEIF1 5                | VDRRC    | 105763    |
| shEIF1A 1               | VDRRC    | 100611    |
| shEIF1A 2               | BDSC     | 29316     |
| shEIF1A 3               | BDSC     | 31185     |
| shEIF1A 4               | VDRRC    | 26022     |
| EIF1A <sup>645</sup>    | BDSC     | 23925     |
| EIF1A <sup>2232</sup>   | BDSC     | 23941     |
| EIF1A <sup>c04533</sup> | BDSC     | 11495     |
| EIF1A <sup>EP935</sup>  | BDSC     | 17203     |
| UAS-EIF1A               | FlyORF   | F000848   |

| Fly Stock                | Source       | Catalog # |
|--------------------------|--------------|-----------|
| shEIF2α 1                | VDRRC        | 7799      |
| shEIF2α 2                | VDRRC        | 104562    |
| shEIF2α 3                | VDRRC        | 7798      |
| EIF2α <sup>815-29</sup>  | BDSC         | 4926      |
| UAS-EIF2α                | FlyORF       | F000983   |
| EIF3B <sup>EY14430</sup> | BDSC         | 20931     |
| shEIF4A                  | BDSC         | 33970     |
| UAS-EIF4A                | Xie Lab      | -         |
| EIF4A <sup>1013</sup>    | BDSC         | 8647      |
| shEIF5 1                 | BDSC         | 34841     |
| shEIF5 2                 | VDRRC        | 29070     |
| UAS-EIF5                 | BDSC         | 22132     |
| EIF5B <sup>09143</sup>   | BDSC         | 11735     |
| EIF5B <sup>EY01401</sup> | BDSC         | 19641     |
| shRHAU                   | VDRRC        | 44984     |
| St r                     | BDSC         | 20040     |
| shDHX57                  | BDSC         | 55373     |
| shBGCN 1                 | VDRRC        | 108334    |
| shBGCN 2                 | VDRRC        | 25590     |
| shBGCN 3                 | BDSC         | 36636     |
| BGCN <sup>KG08129</sup>  | BDSC         | 14687     |
| shRPS25 1                | VDRRC        | 101342    |
| shRPS25 2                | VDRRC        | 52602     |
| shSF2 1                  | BDSC         | 29522     |
| shSF2 2                  | BDSC         | 32367     |
| GMR-GAL4                 | BDSC         | 8605      |
| Tub5-GS                  | Pletcher Lab | -         |
| ElaV-GS                  | Pletcher Lab | -         |
| CGG <sub>90</sub> -EGFP  | Jin Lab      | -         |
| EGFP                     | BDSC         | 6874      |

**Appendix Table S1: Fly stocks used in this study and their sources.**

| <b>Primer Name</b>           | <b>Primer Sequence (5' to 3')</b> |
|------------------------------|-----------------------------------|
| EGFP (Forward)               | TCTTCTTCAAGGACGACGGCAACTAC        |
| EGFP (Reverse)               | GTA CTCCAGCTTGTGCCCCAGGATGT       |
| Belle (Forward)              | CAGTAGCTTGTGGAACGTAAGAAGTTT       |
| Belle (Reverse)              | T TACTCATATTATCCTCCAATCAGTTGC     |
| RPL32 Dmel (Forward)         | GTTGTGCACCAGGAACTTCTTGAATCCG      |
| RPL32 Dmel (Reverse)         | CTTCCAGCTTCAAGATGACCATCCGC        |
| Nanoluciferase (Forward)     | GGTGGTGTACCCTGTGGATG              |
| Nanoluciferase (Reverse)     | AACCCCGTCGATTACCAGTG              |
| Firefly luciferase (Forward) | GCAGTACCGGATTGCCCAAG              |
| Firefly luciferase (Reverse) | GTCGGGGATGATCTGGTTGC              |
| MALAT (Forward)              | TGGTGATGAAGGTAGCAGGC              |
| MALAT (Reverse)              | GGCATGCTGGTCTAGGATCC              |

**Appendix Table S2. Primers used in this study for qRT-PCR.**
